# Supplementary material
Source: PubMed Central journal article supplement (PMC2864228)
Supplement: NIHMS183584-supplement-supplement_1.pdf [file NIHMS183584-supplement-supplement_1.pdf]

10. Pereira, K.D., B.D. Webb, M.L. Blakely, C.S. Cox, Jr., K.P. Lally. Sequelae of recurrent laryngeal nerve injury after patent ductus arteriosus ligation. *Int J Pediatr Otorhinolaryngol* 2006; **70**: 1609-12.
11. Provost, B., S. Heimerl, C. McClain, N.H. Kim, B.R. Lopez, P. Kodituwakku. Concurrent validity of the Bayley Scales of Infant Development II Motor Scale and the Peabody Developmental Motor Scales-2 in children with developmental delays. *Pediatr Phys Ther* 2004; **16**: 149-56.
12. Gould, D.S., L.M. Montenegro, J.W. Gaynor, S.P. Lacy, R. Ittenbach, P. Stephens, J.M. Steven, T.L. Spray, S.C. Nicolson. A comparison of on-site and off-site patent ductus arteriosus ligation in premature infants. *Pediatrics* 2003; **112**: 1298-301.
13. Coombs, R.C., M.E. Morgan, G.M. Durbin, I.W. Booth, A.S. McNeish. Gut blood flow velocities in the newborn: effects of patent ductus arteriosus and parenteral indomethacin. *Arch Dis Child* 1990; **65**: 1067-71.
14. Bancalari, E. Changes in the pathogenesis and prevention of chronic lung disease of prematurity. *Am J Perinatol* 2001; **18**: 1-9.
15. Bose, C.L., M. Laughon. Treatment to prevent patency of the ductus arteriosus: beneficial or harmful? *J Pediatr* 2006; **148**: 713-4.
16. Garland, J., R. Buck, M. Weinberg. Pulmonary hemorrhage risk in infants with a clinically diagnosed patent ductus arteriosus: a retrospective cohort study. *Pediatrics* 1994; **94**: 719-23.
17. Lee, L.C., A. Tillett, R. Tulloh, R. Yates, W. Kelsall. Outcome following patent ductus arteriosus ligation in premature infants: a retrospective cohort analysis. *BMC Pediatr* 2006; **6**: 15.

**Table 1.** Patient characteristics

**S1. Figure/Video 1.** LVFP by fiberoptic exam
